# Supplementary material
Source: publisher figshare collection journal article supplement (https://frontiersin.figshare.com/ndownloader/files/23769209)
Supplement: Supplementary file 1 [file 23769209]

## Maximum local richness

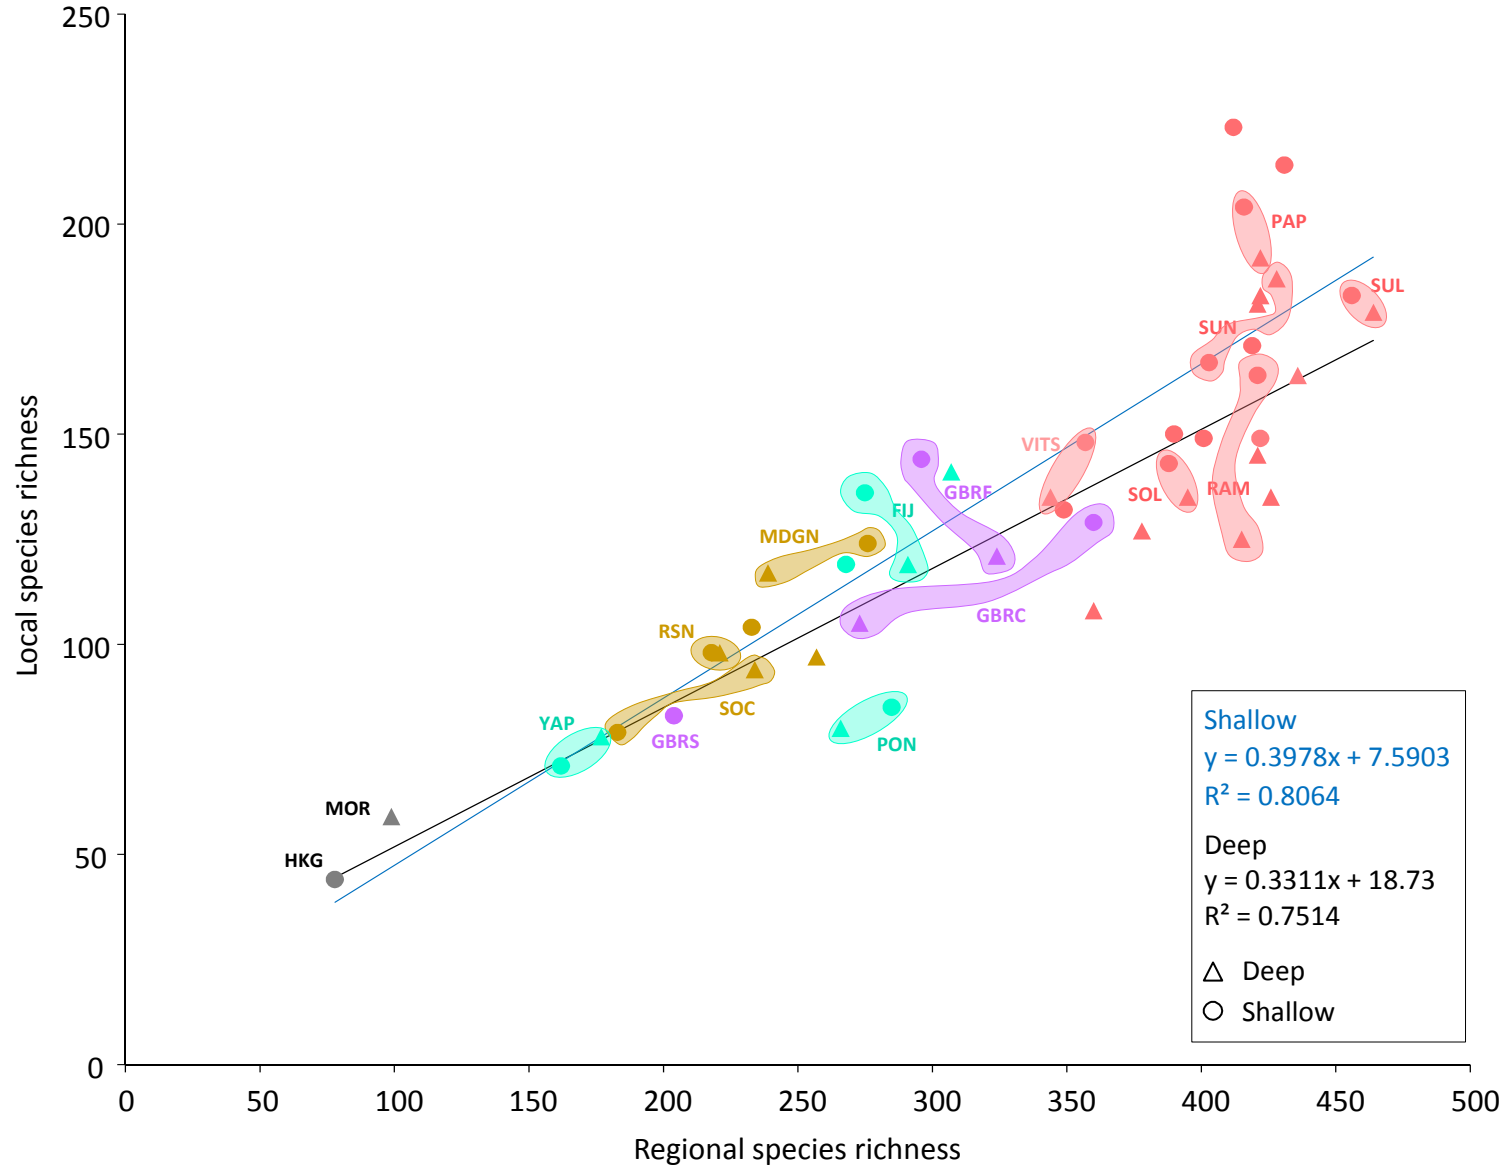

**Supplementary Figure 2.** Traditional linear regression of untransformed maximum site values of local species richness  $S_L$  against regional species richness  $S_R$  for deep and shallow reef slopes. Ecoregion codes and colours are the same as those in Figure 1 and Table 1. Oblongs link deep and shallow scores for selected ecoregions. Note differences in orientation of oblongs among ecoregions in respect of local : regional richness with depth. Not all ecoregion oblongs are drawn. Overall for maximum values of local richness, there were more ecoregions in which shallow slopes (16 ERs richer) were richer than deep slopes (7 ERs richer).
